# Supplementary material
Source: HighWire-hosted journal article supplement (https://jnm.snmjournals.org/highwire/filestream/94478/field_highwire_adjunct_files/0/118760_Supplemental_Data.pdf)
Supplement: 118760_Supplemental_Data.pdf [file 118760_Supplemental_Data.pdf]

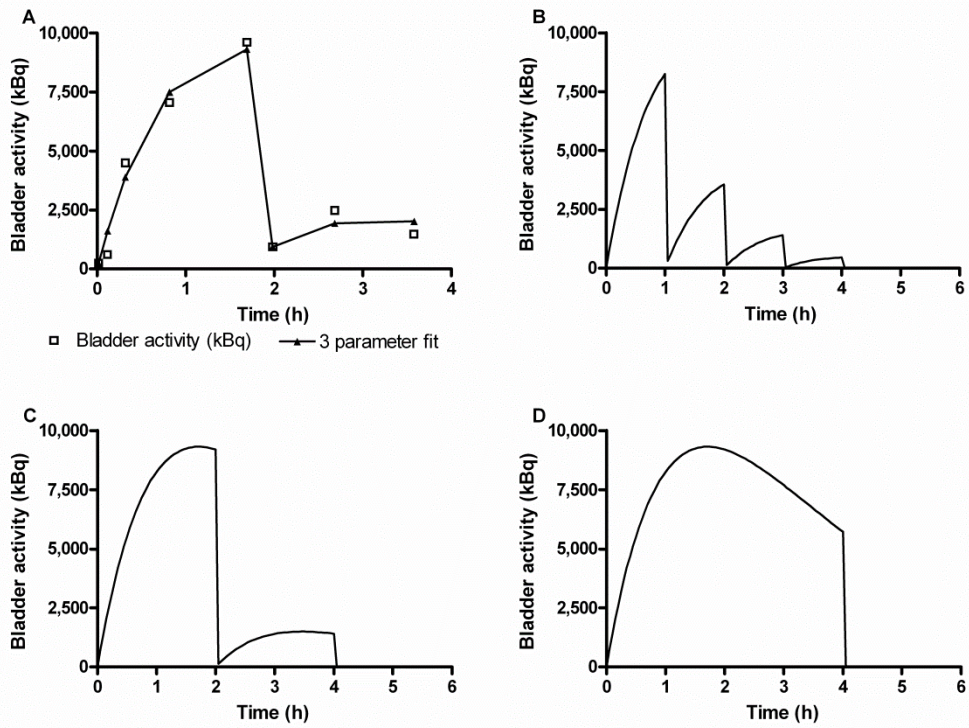

**SUPPLEMENTAL FIGURE 1:** Representative bladder fits for a subject. **(A)** The measured image and urine sample derived time activity curves (TACs) for one subject and the fitted function Eq. 2 (both shown uncorrected for radioactive decay). The fitted functions extrapolated to the following voiding scenarios: complete bladder voids **(B)** every hour, **(C)** every 2 hours, and **(D)** every 4 hours post tracer administration.

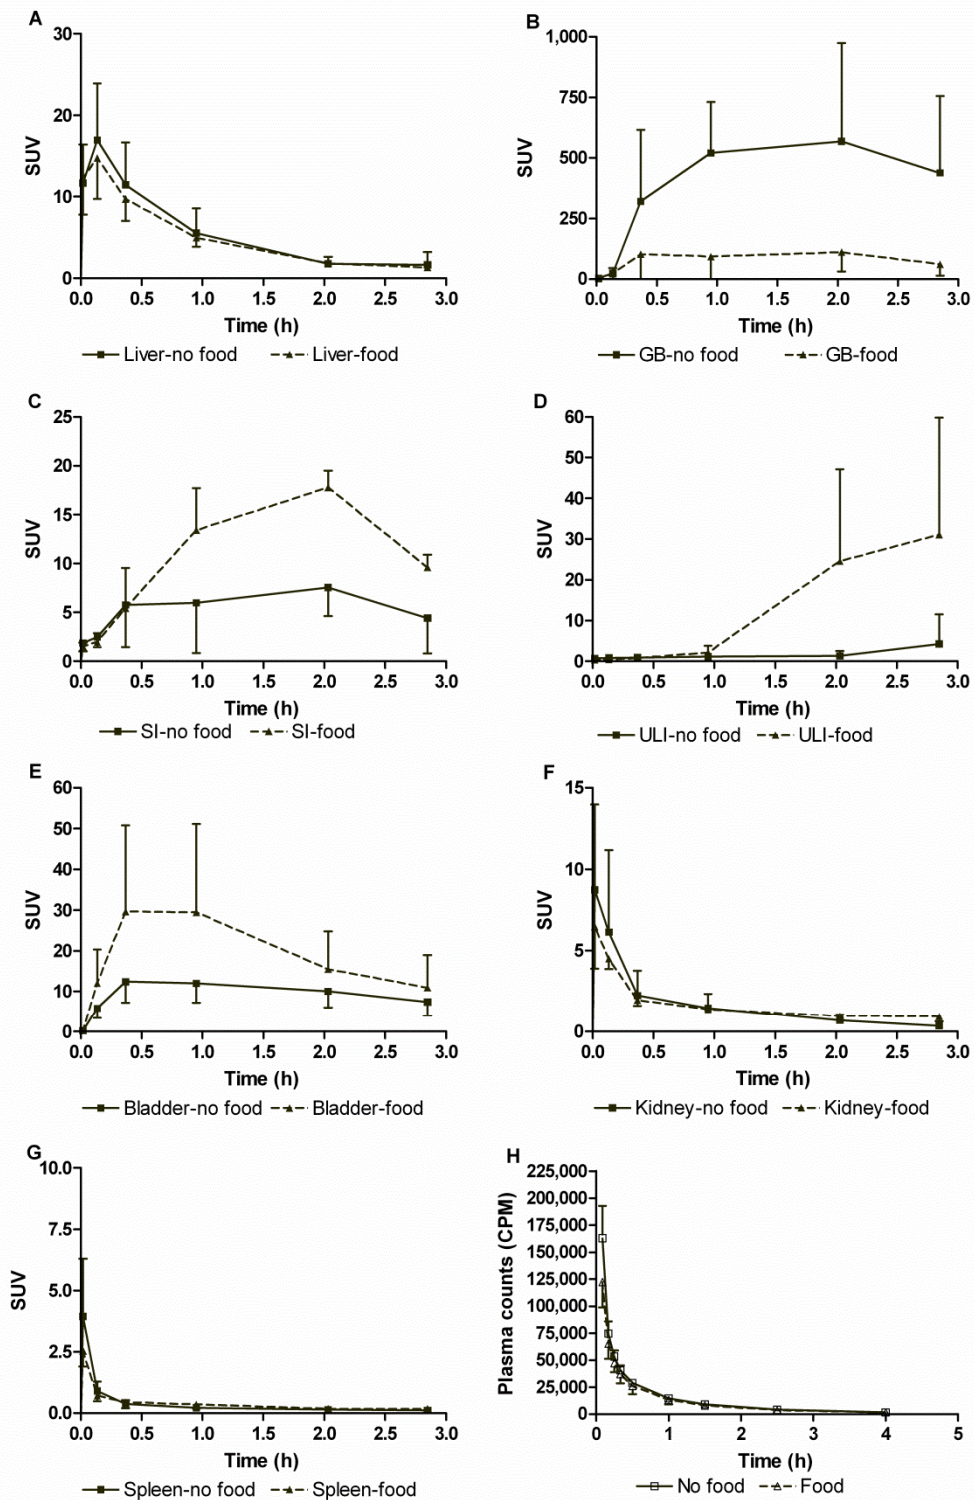

**SUPPLEMENTAL FIGURE 2:** Mean time-activity curves (TACs; normalized to injected activity (kBq), body weight (grams) and uncorrected for radioactive decay) and plasma  $^{18}\text{F}$  radioactivity

concentrations for  $^{18}\text{F}$ -ICMT-11 in subjects who had a meal and in subjects who did not have a meal prior to tracer injection. There was a difference in the TAC profiles of (A) Liver, (B) Gall Bladder, (C) Small intestine, (D) Upper large intestine and (E) Urinary bladder, but no difference in the (F) Kidneys, (G) Spleen or the (H) plasma  $^{18}\text{F}$  radioactivity concentrations. Error bars represent one standard deviation from the mean and are shown one-sided for clarity.
